# Supplementary material
Source: Springer Nature journal article supplement (https://www.springermedizin.de/resource/supplementary/12913_2013_3096_MOESM1_ESM.pdf/9532408)
Supplement: MOESM1 [file 9532408]

| Intervention | Scenario | 1 <sup>st</sup> Drug | 2 <sup>nd</sup> Drug |             |      |     |     |     | 3 <sup>rd</sup> Drug |             |      |     |
|--------------|----------|----------------------|----------------------|-------------|------|-----|-----|-----|----------------------|-------------|------|-----|
|              |          |                      | Original LMV         | Generic LMV | ADV  | TNV | ETV | TVD | Original LMV         | Generic LMV | ADV  | TNV |
| 1            | -        | TNV                  | -                    | -           | -    | -   | -   | -   | -                    | -           | -    | -   |
| 2-3          | 1        | Original LMV         | -                    | -           | ✓ or | ✓   | -   | -   | -                    | -           | -    | -   |
| 4-5          | 1        | Generic LMV          | -                    | -           | ✓ or | ✓   | -   | -   | -                    | -           | -    | -   |
| 6-7          | 1        | ADV                  | ✓ or                 | ✓           | -    | -   | -   | -   | -                    | -           | -    | -   |
| 8-9          | 1        | TVD                  | -                    | -           | ✓ or | ✓   | -   | -   | -                    | -           | -    | -   |
| 10-11        | 1        | ETV                  | -                    | -           | ✓ or | ✓   | -   | -   | -                    | -           | -    | -   |
| 12-13        | 1        | PEG                  | ✓                    | -           | -    | -   | -   | -   | -                    | -           | ✓ or | ✓   |
| 14-15        | 1        | PEG                  | -                    | ✓           | -    | -   | -   | -   | -                    | -           | ✓ or | ✓   |
| 16-17        | 1        | PEG                  | -                    | -           | ✓    | -   | -   | -   | ✓ or                 | ✓           | -    | -   |
| 18-19        | 1        | PEG                  | -                    | -           | -    | -   | -   | ✓   | -                    | -           | ✓ or | ✓   |
| 20-21        | 1        | PEG                  | -                    | -           | -    | -   | ✓   | -   | -                    | -           | ✓ or | ✓   |
| 22           | 1        | PEG                  | -                    | -           | -    | ✓   | -   | -   | -                    | -           | -    | -   |
| 23-24        | 2        | Original LMV         | -                    | -           | ✓    | -   | -   | -   | -                    | -           | ✓ or | ✓   |
| 25-26        | 2        | Generic LMV          | -                    | -           | -    | -   | -   | -   | ✓                    | -           | ✓ or | ✓   |
| 27-28        | 2        | TVD                  | -                    | -           | ✓ or | ✓   | -   | -   | -                    | -           | -    | -   |

Scenario 1=Adding the second drug when drug resistance occurred; Scenario 2= Adding a more potent drug without cross-resistance when the HBV DNA level more than 60 IU/ml at week 24 based on the road map guideline; LMV=Lamivudine; ADV=Adefovir; ETV=Entecavir; TVD=Telbivudine; PEG=Pegylated interferon
